1                   **Enhancement of the immunogenicity of a *Mycobacterium***  
2                   ***tuberculosis* fusion protein using ISCOMATRIX and PLUSCOM**  
3                   **nano-adjuvants after nasal administration in mice**

4  
5   **Arshid Yousefi Avarvand<sup>1</sup>, Zahra Meshkat<sup>2,3</sup>, Farzad Khademi<sup>4</sup>, Ehsan Aryan<sup>2,3</sup>, Mojtaba**  
6   **Sankian<sup>5</sup>, Mohsen Tafaghodi<sup>6\*</sup>**

7  
8   <sup>1</sup>Department of Laboratory Sciences, School of Allied Medical Sciences, Ahvaz Jundishapur  
9   University of Medical Sciences, Ahvaz, Iran

10   <sup>2</sup>Antimicrobial Resistance Research Center, Mashhad University of Medical Sciences, Mashhad,  
11   Iran

12   <sup>3</sup>Department of Medical Bacteriology and Virology, School of Medicine, Mashhad University of  
13   Medical Sciences, Mashhad, Iran

14   <sup>4</sup>Department of Microbiology, School of Medicine, Ardabil University of Medical Sciences,  
15   Ardabil, Iran

16   <sup>5</sup>Immunobiochemistry laboratory, Immunology Research Center, Bu-Ali Research Institute,  
17   Mashhad, Iran

18   <sup>6</sup>Nanotechnology Research Center, Pharmaceutical Technology Institute, Mashhad University of  
19   Medical Sciences, Mashhad Iran

20   \*Corresponding author

21  
22   Arshid Yousefi Avarvand email address: arshid.yousefi5@gmail.com

23   Zahra Meshkat official email address: meshkatz@mums.ac.ir

24   Farzad Khademi email address: [k\\_farzad@yahoo.com](mailto:k_farzad@yahoo.com)

25   Ehsan Aryan email address: aryane@mums.ac.ir

26   Mojtaba Sankian email address: msankian@mums.ac.ir

27   Official email address for corresponding author (Mohsen Tafaghodi): tafaghodim@mums.ac.ir

28   Tel: ++98 51 31801337; Fax: ++98 51 38823251

40  
41  
42  
43  
44  
45  
46  
47  
48  
49  
50  
51  
52  
53  
54  
55  
56  
57  
58  
59  
60  
61  
62  
63  
64  
65  
66  
67  
68  
69  
70  
71  
72  
73  
74  
75  
76  
77  
78  
79  
80  
81  
82

## Abstract

**Background:** Tuberculosis (TB), a contagious disease caused by *Mycobacterium tuberculosis* (*M. tuberculosis*), remains a health problem worldwide and this infection has the highest mortality rate among bacterial infections. Current studies suggest that intranasal administration of new tuberculosis vaccines could enhance the immunogenicity of *M. tuberculosis* antigens. Hence, we aim to evaluate the protective efficacy and immunogenicity of HspX/EsxS fusion protein of *M. tuberculosis* along with ISCOMATRIX and PLUSCOM nano-adjuvants and MPLA through the intranasal administration in mice model.

**Methods:** In present study, the recombinant fusion protein was expressed in *Escherichia coli* and purified and used to prepare different nanoparticle formulations in combination with ISCOMATRIX and PLUSCOM nano-adjuvants and MPLA. Mice were intranasally vaccinated with each formulation three times at an interval of 2 weeks. Finally, IFN- $\gamma$ , IL-4, IL-17 and TGF- $\beta$  concentration in supernatant of cultured splenocytes of vaccinated mice as well as serum titers of IgG1 and IgG2a and sIgA titers in nasal lavage were determined.

**Results:** According to obtained results, intranasally vaccinated mice with formulations containing ISCOMATRIX and PLUSCOM nano-adjuvants and MPLA could effectively induced IFN- $\gamma$  and sIgA responses. Moreover, both HspX/EsxS/ISCOMATRIX/MPLA and HspX/EsxS/PLUSCOM/MPLA and their BCG booster formulation could strongly stimulate the immune system and enhance the immunogenicity of *M. tuberculosis* antigens.

**Conclusion:** The results demonstrate the potential of HspX/EsxS-fused protein in combination with ISCOMATRIX, PLUSCOM and MPLA after nasal administration in enhancing immune response against of *M. tuberculosis* antigens. So, nasal immunization with these formulations, could induce immune responses and considered as new TB vaccine or as BCG booster.

**Keywords:** *Mycobacterium tuberculosis*, HspX/EsxS, ISCOMATRIX, PLUSCOM, MPLA, Nasal administration.

## 83 Introduction

84 Tuberculosis (TB) is a contagious disease with approximately 1.7 billion latently infected people  
85 and over 1.2 million deaths annually. TB is among the 10 causes of death worldwide, according  
86 to the latest World Health Organization (WHO) report which can be controlled using early  
87 vaccination as well as rapid detection and treatment with the first- and second anti-TB drugs (1-  
88 4). However, the emergence of *Mycobacterium tuberculosis* (*M. tuberculosis*) resistant strains  
89 particularly rifampicin-resistant and multidrug-resistant TB (MDR) have led to treatment failures  
90 (5). Furthermore, for many years, existence of some disadvantages in the only licensed *M.*  
91 *tuberculosis* vaccine, BCG (Calmette-Guérin Bacillus), has led to many efforts to assess the  
92 other ways of controlling the TB disease (6, 7). Efficacy of BCG vaccine for pulmonary TB  
93 decreases during lifetime and therefore it is more effective against newborns and children (8, 9).  
94 Additionally, BCG is not recommended for patients with immune deficiency and is not able to  
95 control the latent TB infection which can act as reservoir of active TB infection (3). Therefore,  
96 several vaccines are in different steps of clinical or preclinical studies. These vaccines are  
97 examined for either pre-exposure prevention which can be administrated before TB infection in  
98 newborns and adolescents or as post-exposure and therapeutic vaccines which can be  
99 administered in adolescents and adults after TB infection to eliminate latent TB. These new types  
100 of TB vaccines considered as either alternative for BCG vaccine or as booster of BCG prime (10-  
101 12). Multi-stage subunit vaccines as pre-exposure, post-exposure and therapeutic vaccines, are  
102 promising candidates for boosting BCG-primed immunity or a prime-vaccine alternative for  
103 BCG vaccine (10, 13). On the other hand, combining multi-stage subunit vaccines with adjuvants  
104 and delivery systems can potentiate the immunogenicity of multi-stage vaccines, protect antigens  
105 from enzymatic degradation and *in vivo* elimination, targeted delivery and then efficient uptake  
106 of antigens and control of antigens release (14, 15). In a series of the studies, we evaluated the  
107 potential of a novel multicomponent subunit vaccine candidate called HspX/EsxS-fused protein,  
108 a latent-phase protein (HspX) plus an early-phase protein (EsxS), along with various adjuvants  
109 such as DOTAP (1, 2-dioleoyl-3-trimethylammonium propane), MPLA (monophosphoryl lipid  
110 A) and DDA (dimethyl dioctadecylammonium bromide) as well as delivery systems such as  
111 PLGA (poly (lactide-co-glycolide)) through different administration routes in animal model in  
112 order to enhance the immunogenicity of *M. tuberculosis* antigens (16-18). Furthermore, two  
113 nano-adjuvants ISCOMATRIX, a negatively charged particle, and PLUSCOM, a positively  
114 charged ISCOMATRIX, were also evaluated along with HspX/EsxS-fused protein via  
115 subcutaneous administration and the results were promising in animal model (unpublished data).  
116 However, as *M. tuberculosis* enters via respiratory tract, the mucosal administration of these  
117 formulations might rapidly induce the innate and adaptive immune response at the at the  
118 respiratory mucosal surfaces (10, 19, 20). Therefore, we followed two aims; 1) determine the  
119 potential of HspX/EsxS-fused protein in combination with ISCOMATRIX, PLUSCOM and  
120 MPLA after nasal administration and 2) comparison of the current results with our previous  
121 results.

## 122 **Materials and Methods**

### 123 **Preparation of HspX/EsxS protein, ISCOMATRIX and PLUSCOM nano-adjuvants**

124 Synthesis of the HspX/EsxS fused protein was performed as described previously. To perform  
125 this, the recombinant fusion protein was expressed in *Escherichia coli*, purified on a  
126 chromatography column (Parstous Biotechnology, Iran) and then verified by SDS-PAGE and  
127 western blot. The protein concentration was also measured by BCA kit (Parstous Biotechnology,  
128 Iran) (16). Furthermore, ISCOMATRIX and PLUSCOM nano-adjuvants were prepared by the  
129 lipid film hydration method. Briefly, to provide the ISCOMATRIX nano-adjuvant, 200  $\mu$ L of  
130 cholesterol (4 mg/mL) along with 320  $\mu$ L of phosphatidylcholine (8 mg/mL) (Avanti polar  
131 lipids, USA) were dissolved in dichloromethane and then mixed and vacuum dried to eliminate  
132 the dichloromethane and establish the lipid film. The PLUSCOM lipid film was also prepared by  
133 mixing 200  $\mu$ L of DDA (4, 8 or 16 mg/mL) and 320  $\mu$ L of phosphatidylcholine (8 mg/mL)  
134 dissolved in dichloromethane. Both ISCOMATRIX and PLUSCOM lipid films were hydrated by  
135 200 mg of sucrose (Merck, Germany), dissolved in distilled water (2 mL) and butanol (2 mL),  
136 and then freeze-dried for overnight. The freeze-dried powders were combined with an aqueous  
137 phase containing saponin (8 mg in 4 mL of PBS (0.01 M), pH 7.4) (Sigma-Aldrich, USA) and  
138 then bath sonicated (Kerry, UK) at 37 °C for 10 minutes. Dynamic light scattering (DLS)  
139 (Zetasizer Nano, Malvern, UK) was used to measure the particle size and surface charge of nano-  
140 adjuvants (20-23).

141

### 142 **Preparation of vaccine formulations, mice vaccination and immunoassay**

143 The following vaccine formulations were prepared in aseptic conditions in order to nasal  
144 administration of 10 mice groups including 5 BALB/c mice, 6 to 8 weeks old, in each group: 1)  
145 PBS (negative control), 2) BCG ( $5 \times 10^5$  CFU/mouse), 3) HspX/EsxS, 4) HspX/EsxS/MPLA, 5)  
146 HspX/EsxS/ISCOMATRIX, 6) HspX/EsxS/PLUSCOM, 7) HspX/EsxS/ISCOMATRIX/MPLA,  
147 8) HspX/EsxS/PLUSCOM/MPLA, 9) HspX/EsxS/ISCOMATRIX/MPLA as BCG booster and  
148 10) HspX/EsxS/PLUSCOM /MPLA as BCG booster. Mice were nasally vaccinated with 20  $\mu$ L  
149 of each formulation (10  $\mu$ g of HspX/EsxS, 15  $\mu$ g of ISCOMATRIX, 15  $\mu$ g of PLUSCOM and  
150 15  $\mu$ g of MPLA) three times at an interval of 2 weeks.

151 Three weeks after final vaccination, nasal lavage, blood and spleen of vaccinated mice were used  
152 to assay IgA, IgG1 and IgG2a titers as well as interferon gamma (IFN- $\gamma$ ), interleukin 4 (IL-4),  
153 interleukin 17 (IL-17) and transforming growth factor beta (TGF- $\beta$ ) cytokines (18, 24). For  
154 cytokine assays, production of IFN- $\gamma$ , IL-4, IL-17 and TGF- $\beta$  by splenic lymphocytes ( $2 \times 10^6$   
155 cells/well) of mice which were stimulated with each formulation, measured in supernatant of  
156 cultured splenocytes according to the enzyme-linked immunosorbent assay (ELISA) kit  
157 (eBioscience, USA). Additionally, goat anti-mouse IgA:HRP, IgG1:HRP, and IgG2a:HRP  
158 (Invitrogen, USA) were used for measurement of lavage anti-HspX/EsxS IgA titers and serum  
159 anti-HspX/EsxS IgG1 and IgG2a titers(20).

160

### 161 **Statistical analysis**

162 All statistical analysis was performed by the GraphPad Prism 8.0 software, and all data analysis  
163 was performed by one-way ANOVA in combination with Tukey's multiple comparison tests.  
164 Values were expressed as mean  $\pm$  SD, when  $p$ -value $<0.05$ , differences was considered as  
165 statistically significant. Significance was presented as \*( $P < 0.05$ ), \*\*( $P < 0.01$ ), \*\*\*( $P < 0.001$ )  
166 and \*\*\*\*( $P < 0.0001$ ) and not significant was shown as (ns).

167  
168  
169  
170  
171  
172  
173  
174  
175  
176  
177  
178  
179  
180  
181  
182  
183  
184  
185  
186  
187  
188  
189  
190  
191  
192  
193  
194  
195  
196  
197  
198  
199  
200  
201

## 202 Results

### 203 Assessment of IFN- $\gamma$ response

204 After nasal administration, our results showed that formulations contain nano-adjuvants  
205 ISCOMATRIX (ISCOMATRIX/HspX/EsxS) and PLUSCOM (PLUSCOM/HspX/EsxS) were  
206 able to boost HspX/EsxS immunogenicity and induced higher level of IFN- $\gamma$  response compared  
207 to HspX/EsxS alone, ( $P < 0.001$ ) and ( $P < 0.0001$ ) respectively. Also, addition of MPLA adjuvant  
208 to ISCOMATRIX/HspX/EsxS and PLUSCOM/HspX/EsxS formulations was promoted the  
209 immune responses. The spleen cells of the mice receiving HspX/EsxS/ISCOMATRIX/MPLA  
210 and HspX/EsxS/PLUSCOM/MPLA formulations were significantly produced the higher level of  
211 IFN- $\gamma$  than those receiving HspX/EsxS/ISCOMATRIX and HspX/EsxS/PLUSCOM,  
212 respectively ( $p < 0.01$ ) and ( $p < 0.05$ ). There was no significant difference between BCG boosters  
213 of HspX/EsxS/ISCOMATRIX/MPLA and HspX/EsxS/PLUSCOM/MPLA ( $P > 0.05$ ), although,  
214 both HspX/EsxS/ISCOMATRIX/MPLA and HspX/EsxS/PLUSCOM/MPLA and their BCG  
215 booster formulation were able to induce IFN- $\gamma$  response significantly higher than BCG group ( $P$   
216  $< 0.001$ ) (Figure 1).

217

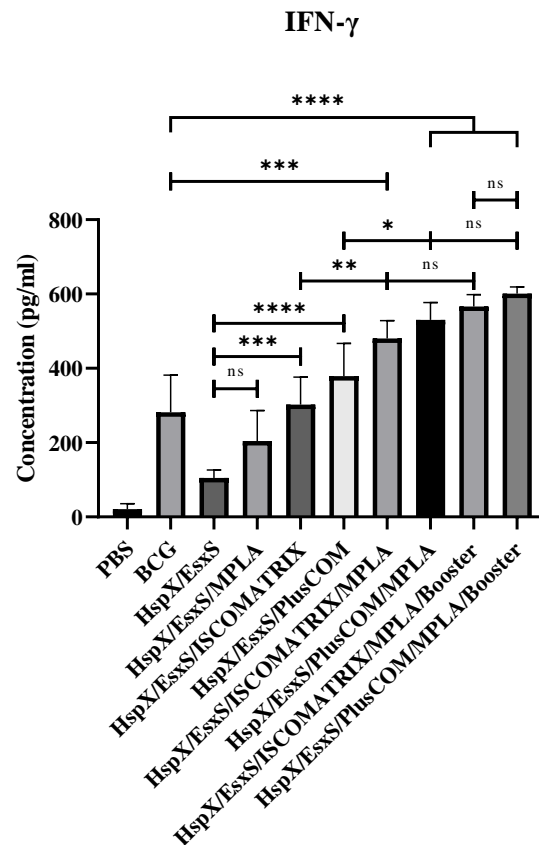

218

219 **Figure 1.** The level of IFN- $\gamma$  produced in the spleen cells of the mice receiving different  
220 formulations.

221 **Assessment of IL-17 response**

222 Our result show that different formulations did not induce IL-17 response significantly in the  
223 stimulated splenic lymphocytes of mice compare to BCG group ( $P > 0.05$ ) (Figure 2).

224

**IL-17**

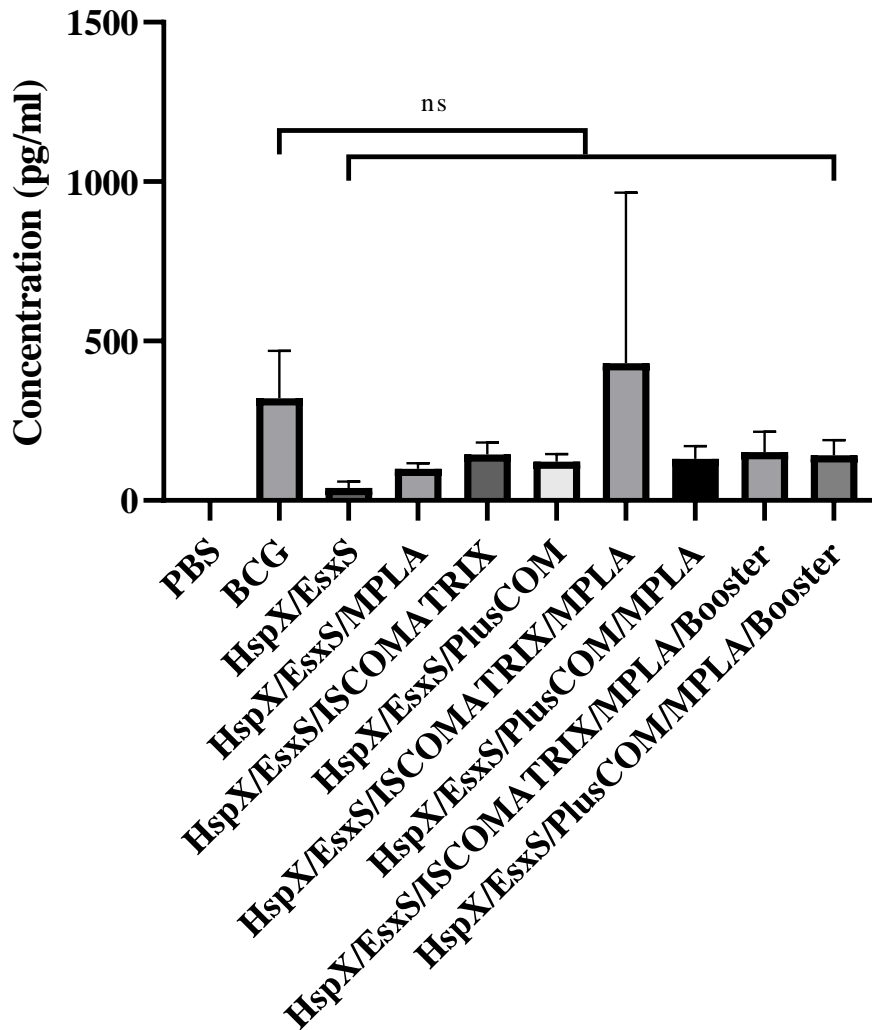

225

226

227 **Figure 2.** The level of IL-17 produced in the spleen cells of the mice receiving different

228 formulations.

229 **Assessment of IL-4 response**

230 According to obtained result the level of IL-4 secretion in vaccinated mice with BCG booster of  
231 HspX/EsxS/PLUSCOM/MPLA formulation was higher than HspX/EsxS and BCG vaccine  
232 ( $P>0.05$ ). However, any formulations weren't able to induce IL-4 response significantly higher  
233 than BCG group ( $P>0.05$ ). (Figure 3)

234

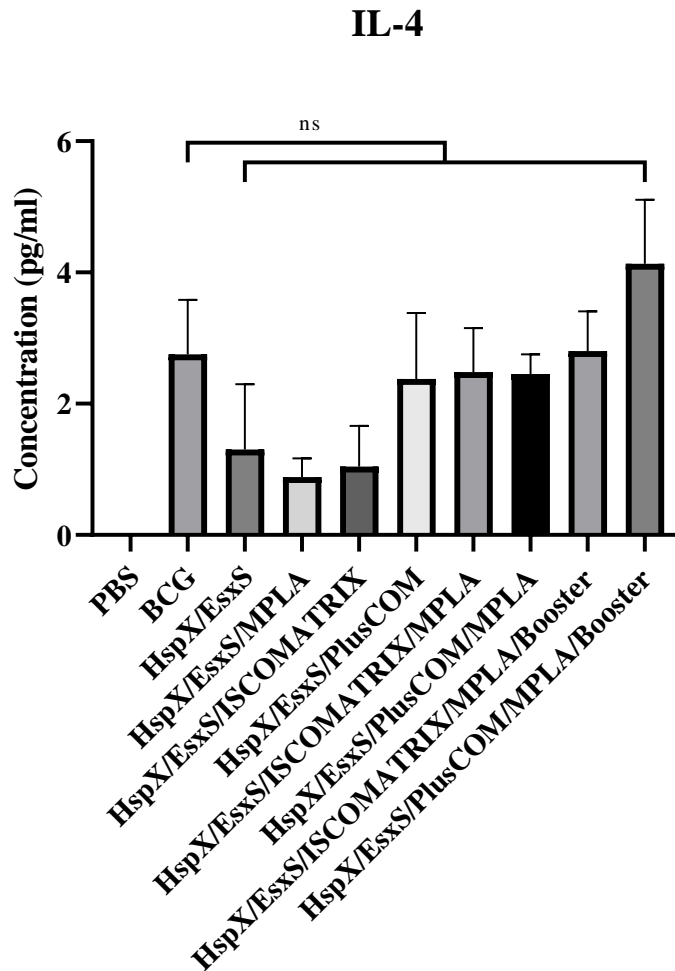

235

236 **Figure 3.** The level of IL-4 produced in the spleen cells of the mice receiving different  
237 formulations.

238

239

240

241



242 **Assessment of TGF- $\beta$  response**

243 Similar to IL-4 and IL-17, there was no significant difference between different formulation and  
244 BCG group in induction of TGF- $\beta$  response ( $P>0.05$ ). (Figure 4)

245

246

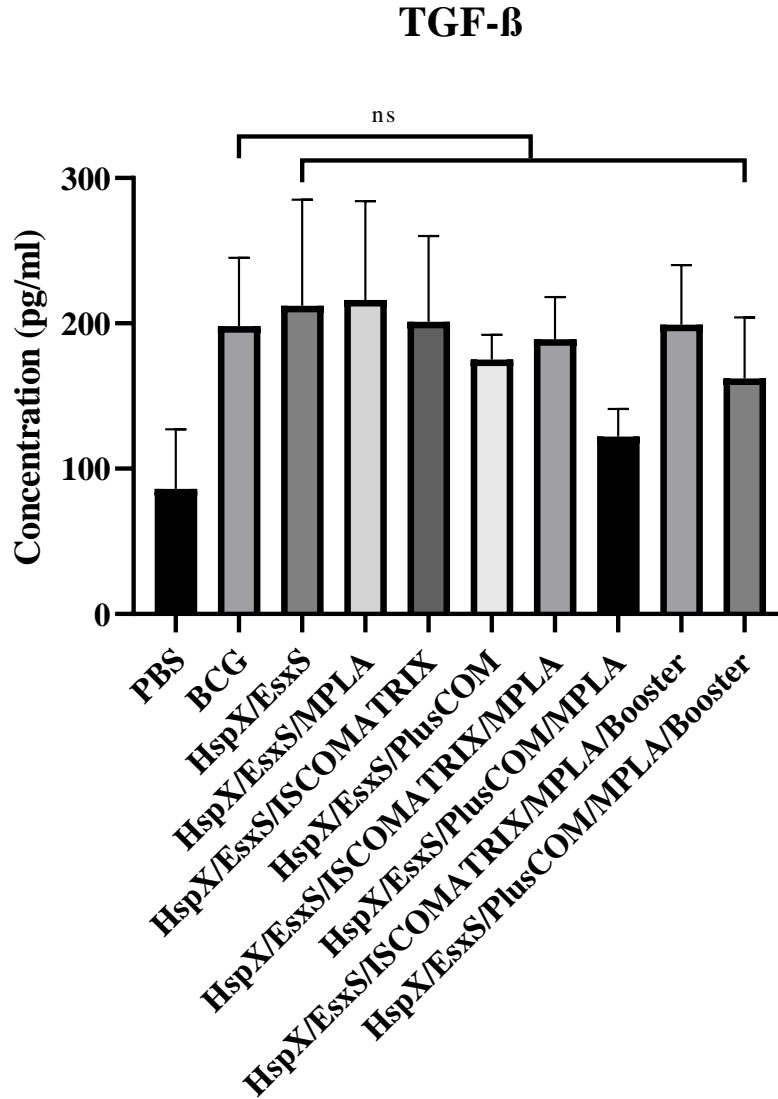

247

248 **Figure 4.** The level of TGF- $\beta$  produced in the spleen cells of the mice receiving different  
249 formulations.

250

251

252

253

254 **Assessment of IgG2a antibody response**

255 the level of serum anti-HspX/EsxS IgG2a titers in mice vaccinated with  
256 HspX/EsxS/ISCOMATRIX/MPLA, HspX/EsxS/PLUSCOM/MPLA and their BCG booster  
257 formulations was significantly higher than HspX/EsxS and BCG vaccine ( $P < 0.0001$ ).  
258 Additionally, HspX/EsxS/PlusCOM/MPLA/Booster was able to significantly increase IgG2a  
259 responses higher than HspX/EsxS/PlusCOM/MPLA ( $P < 0.01$ ). (Figure 5)

260

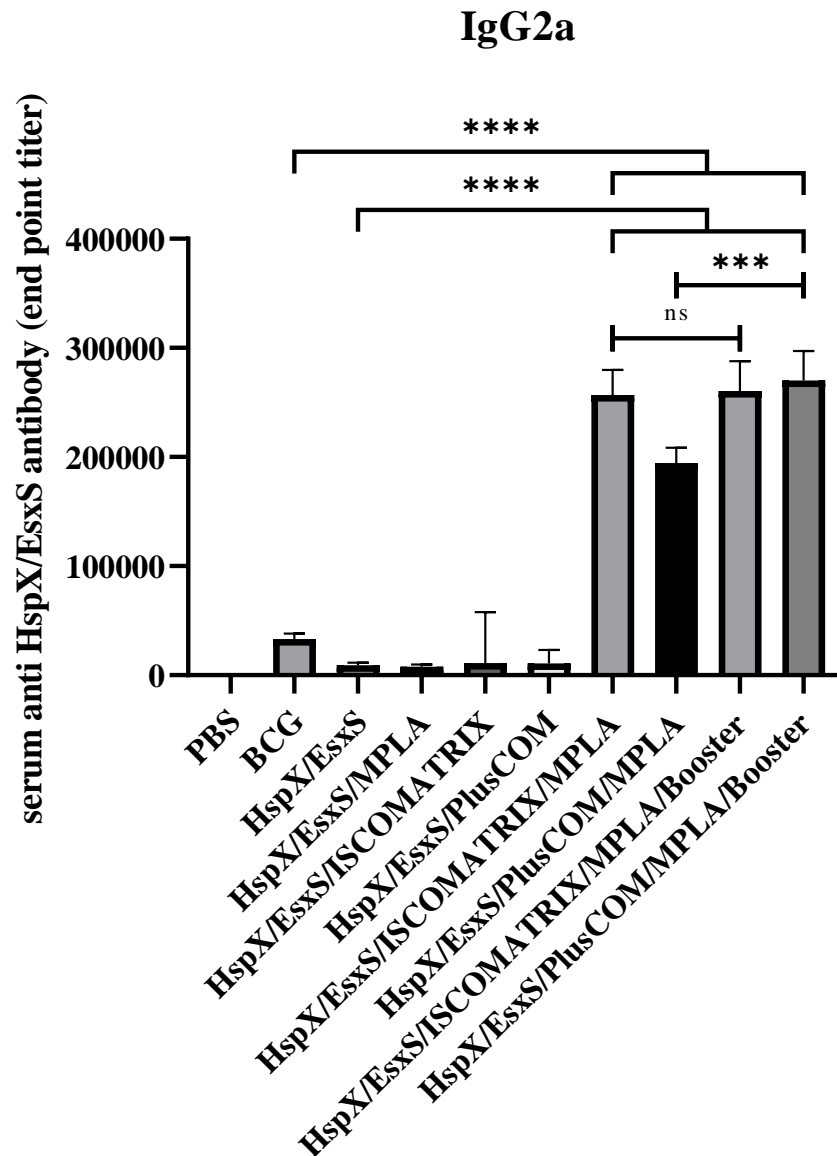

261

262

263 **Figure 5.** The level of IgG2a produced in the serum of mice receiving different formulation.

264 **Assessment of IgG1 antibody response**

265 The level of serum anti-HspX/EsxS IgG1 titers as well as IgG2a was significantly increased in  
266 the mice receiving HspX/EsxS/ISCOMATRIX/MPLA, HspX/EsxS/PLUSCOM/MPLA and  
267 BCG booster formulations in comparison with HspX/EsxS and BCG vaccine ( $P < 0.0001$ ). Also,  
268 addition of MPLA adjuvant and BCG booster formulation, significantly increased the effect of  
269 HspX/EsxS/ISCOMATRIX and HspX/EsxS/PLUSCOM formulations on IgG1 antibody  
270 response ( $P < 0.0001$ ) (Figure 6).

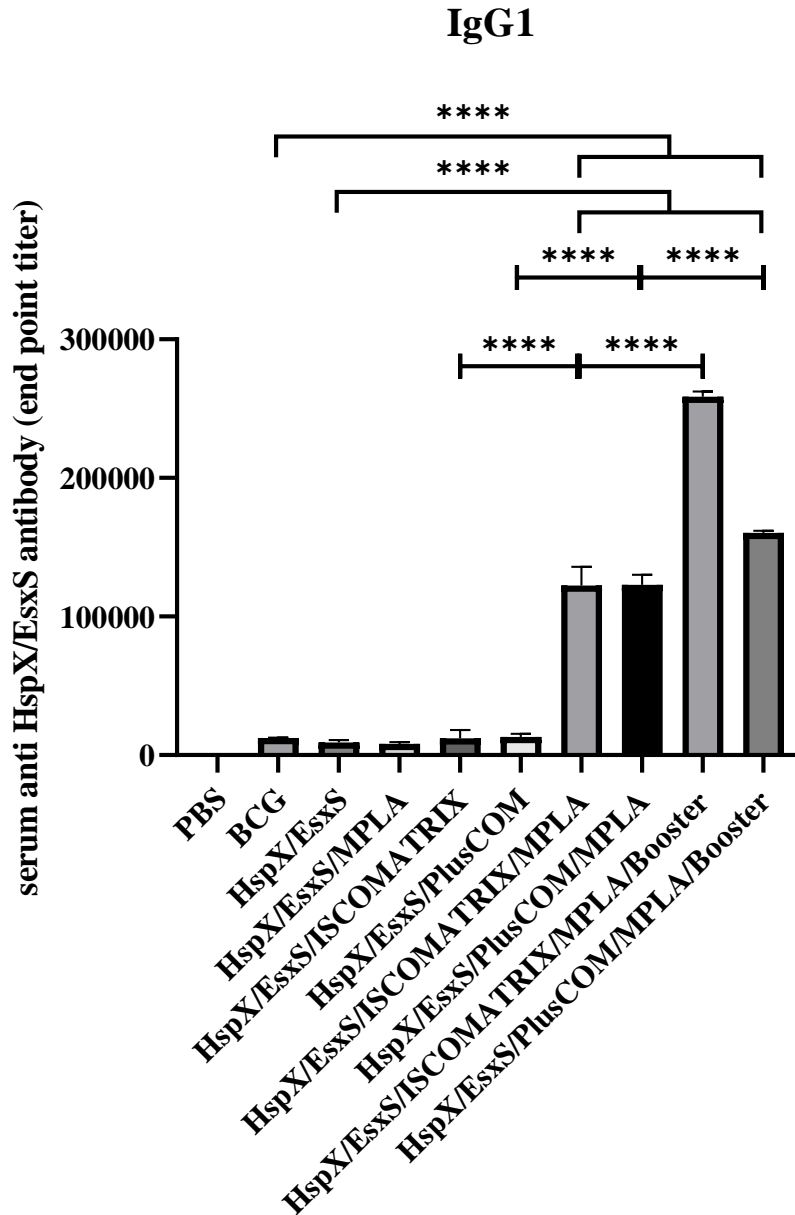

271

272

**Figure 6.** The level of IgG1 produced in the serum of mice receiving different formulation.

273

## 274 Assessment of sIgA antibody response

275 Anti-HspX/EsxS sIgA antibody in nasal lavage of vaccinated mice was significantly higher in  
276 HspX/EsxS/ISCOMATRIX, HspX/EsxS/PLUSCOM, HspX/EsxS/ISCOMATRIX/MPLA,  
277 HspX/EsxS/PLUSCOM/MPLA and their BCG booster formulation in comparison with  
278 HspX/EsxS and BCG vaccine ( $P < 0.05$ ). Furthermore, the highest level of sIgA antibody  
279 response belonged to HspX/EsxS/PlusCOM/MPLA/Booster formulation. BCG booster of  
280 HspX/EsxS/PLUSCOM/MPLA was significantly induced higher levels of sIgA antibody  
281 secretion than Other BCG booster formulation, ISCOMATRIX/HspX/EsxS/MPLA ( $P < 0.0001$ ).  
282 Moreover, PLUSCOM containing formulations were able to induce higher sIgA responses than  
283 ISCOMATRIX containing formulation (Figure 7).

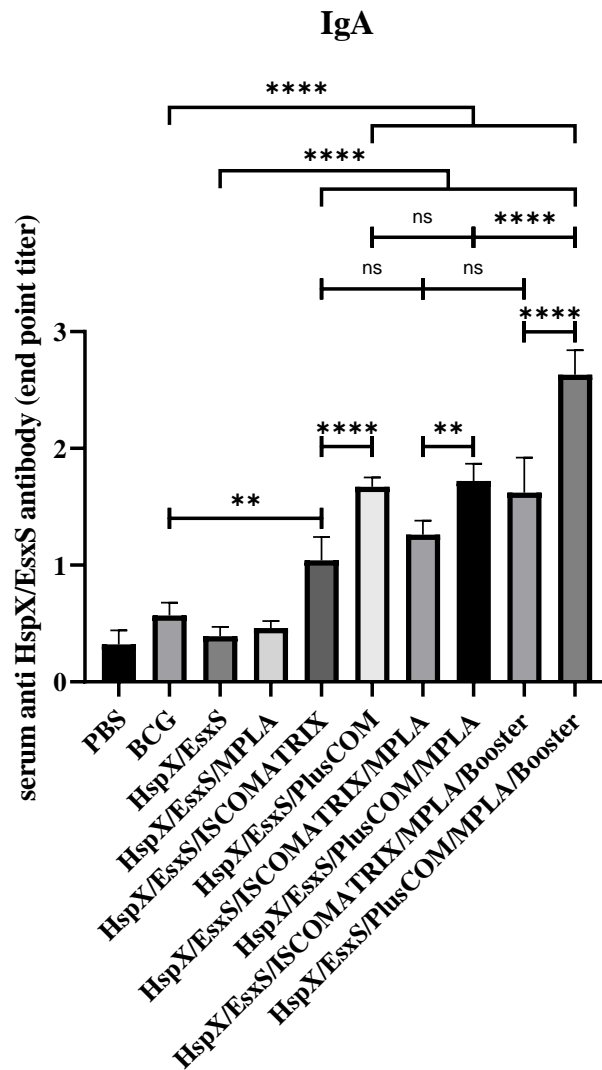

284

285 **Figure 7.** The level of anti-HspX/EsxS sIgA produced in nasal lavage of mice receiving different  
286 formulation.

## 287 **Discussion**

288 After 1984 which Morein and colleagues for the first time were developed ISCOM-like  
289 structures, the results of several animal models and human clinical trials suggested that  
290 ISCOMATRIX-based vaccines are safe, well tolerated and immunogenic and able to induce  
291 strong humoral and cellular responses. The components of ISCOMATRIX adjuvant, i.e. saponin,  
292 cholesterol and phospholipid, form a cage-like structure (40-50 nm in diameter and about -20  
293 mV in surface charge of particle) that facilitate antigen-presentation and antigen-delivery and  
294 also show immunomodulatory properties (25, 26). Efficacy of ISCOMATRIX adjuvant is  
295 currently under evaluation for cancer and some chronic infectious diseases such as hepatitis C  
296 virus and influenza, however, there is no study assessing ISCOMATRIX-based TB vaccines  
297 (27). In the current study, intranasal administration of ISCOMATRIX adjuvant in combination  
298 with HspX/EsxS antigen increased immune response especially the level of IFN- $\gamma$  and IgG1,  
299 IgG2a and sIgA antibodies compared to alone antigen. A similar result was observed with the  
300 same formulation when administrated subcutaneously (20). It shows that ISCOMATRIX can  
301 boost immunogenicity of antigen which is a main weakness of subunit antigen vaccines. Other  
302 classic ISCOMs derivatives with a cage-like structure and positive surface charge is a cationic  
303 immune stimulating complex called PLUSCOM. The PLUSCOMs similar to ISCOMATRIXs  
304 can act as an immunoadjuvant and are able to induce T cell responses against an antigen, which  
305 is the most important human body response against TB infection (23, 28, 29). Positively charged  
306 PLUSCOM nano-adjuvant in combination with TB fused antigen was able to induce higher sIgA  
307 and IFN- $\gamma$  responses than negatively charged ISCOMATRIX-antigen formulation after intranasal  
308 administration. Similar results were observed in subcutaneous route (20). One possible reason  
309 that is the positively charged PLUSCOM adjuvant strongly improves the particle-antigen uptake  
310 by the physiological surfaces such as mucosal surfaces as well as by the negatively charged  
311 immune cells particularly APCs and subsequent presentation to T cells (17, 28, 30). It is  
312 recommended that ISCOMATRIX adjuvant can be a good choice for using in the prophylactic  
313 and therapeutic vaccines. Prophylactic TB vaccine candidates are pre-exposure vaccines and  
314 similar to BCG can be administered after birth time. These types of TB vaccine candidates could  
315 be replaced with BCG or act as BCG booster (7, 25, 31). Our results revealed that ability of  
316 PLUSCOM/HspX/EsxS and ISCOMATRIX/HspX/EsxS formulations to elicit IFN- $\gamma$  response  
317 were higher than BCG vaccine. These vaccine formulations cannot be replaced with BCG  
318 because the results were not statistically significant in some cases. Also, addition of MPLA  
319 adjuvant into ISCOMATRIX/HspX/EsxS and PLUSCOM/HspX/EsxS formulations was  
320 promoted the immune responses. The results were encouraging in intranasally vaccinated mice  
321 with formulations HspX/EsxS/ISCOMATRIX/MPLA, HspX/EsxS/PLUSCOM/MPLA and two  
322 BCG booster groups. Similar findings were obtained for the same groups when administrated via  
323 subcutaneous route (20).

324

325  
326  
327  
328  
329  
330  
331  
332  
333  
334  
335  
336  
337  
338  
339  
340  
341  
342  
343  
344  
345  
346  
347  
348  
349  
350  
351  
352  
353  
354  
355  
356  
357  
358  
359  
360  
361

### **Conclusion**

Taken together, our study suggested that ISCOMATRIX and PLUSCOM nano-adjuvants were able to boost HspX/EsxS immunogenicity and induced higher level of IFN- $\gamma$  response and sIgA antibodies secretion compared to HspX/EsxS alone and addition of MPLA adjuvant promoted the immune responses. Furthermore, both HspX/EsxS/ISCOMATRIX/MPLA and HspX/EsxS/PLUSCOM/MPLA and their BCG booster formulation were able to induce IFN- $\gamma$  response significantly higher than BCG group. These findings demonstrate that both nanoparticles in combination with MPLA can act as immunoadjuvant. However, further *in vivo* experiments are required to confirm the efficacy of these formulations as new TB vaccine or as BCG booster.

### **Acknowledgment:**

This work was part of a PhD dissertation by Arshid Yousefi Avarvand and supported by a grant number 940965 from Vice Chancellor for Research, Mashhad University of Medical Sciences. The authors are grateful to personnel of Bu-Ali Research Institute, Mashhad University of Medical Sciences for technical assistance and valuable helps.

### **Author contributions**

Zahra Meshkat and Mohsen Tafaghodi conceived and designed research. Arshid Yousefi Avarvand conducted experiments. Arshid Yousefi Avarvand and Farzad Khademi analyzed data. Arshid Yousefi Avarvand wrote the manuscript. Ehsan Aryan, Mojtaba Sankian prepared the tables and figures. All authors read and approved the manuscript.

### **Compliance with ethical standards**

Conflict of interest: The authors declare no conflict of interest.  
Ethical statement: All applicable international, national, and institutional guidelines for the care and use of animals were followed.

## 362 **References**

- 363 1. Organization WH. Global status report on alcohol and health 2018: World Health Organization;  
364 2019.
- 365 2. Avarvand AY, Khademi F, Tafaghodi M, Ahmadipour Z, Moradi B, Meshkat Z. The roles of  
366 latency-associated antigens in tuberculosis vaccines. *Indian Journal of Tuberculosis*. 2019;66(4):487-91.
- 367 3. Yousefi-Avarvand A, Tafaghodi M, Soleimanpour S, Khademi F. HspX protein as a candidate  
368 vaccine against *Mycobacterium tuberculosis*: an overview. *Frontiers in Biology*. 2018;13(4):293-6.
- 369 4. Khademi F, Yousefi-Avarvand A, Derakhshan M, Vaez H, Sadeghi R. Middle east *Mycobacterium*  
370 *tuberculosis* antibiotic resistance: a systematic review and meta-analysis. *Infection, Epidemiology and*  
371 *Microbiology*. 2017;3(1):25-35.
- 372 5. Ghafoor T, Ikram A, Abbassi SA, Mirza IA, Hussain A, ullah Khan I, et al. Antimicrobial Sensitivity  
373 Pattern of Clinical Isolates of *Mycobacterium Tuberculosis*: A-Retrospective Study from a Reference  
374 Laboratory in Pakistan. *J Virol Microbiol*. 2014;2014(2014):1-6.
- 375 6. Liang J, Teng X, Yuan X, Zhang Y, Shi C, Yue T, et al. Enhanced and durable protective immune  
376 responses induced by a cocktail of recombinant BCG strains expressing antigens of multistage of  
377 *Mycobacterium tuberculosis*. *Molecular immunology*. 2015;66(2):392-401.
- 378 7. Andersen P, Kaufmann SH. Novel vaccination strategies against tuberculosis. *Cold Spring Harbor*  
379 *perspectives in medicine*. 2014;4(6):a018523.
- 380 8. da Costa AC, de Oliveira Costa-Junior A, de Oliveira FM, Nogueira SV, Rosa JD, Resende DP, et al.  
381 A new recombinant BCG vaccine induces specific Th17 and Th1 effector cells with higher protective  
382 efficacy against tuberculosis. *PLoS One*. 2014;9(11):e112848.
- 383 9. Soleimanpour S, Farsiani H, Mosavat A, Ghazvini K, Eydgahi MRA, Sankian M, et al. APC targeting  
384 enhances immunogenicity of a novel multistage Fc-fusion tuberculosis vaccine in mice. *Applied*  
385 *microbiology and biotechnology*. 2015;99(24):10467-80.
- 386 10. Khademi F, Derakhshan M, Yousefi-Avarvand A, Tafaghodi M, Soleimanpour S. Multi-stage  
387 subunit vaccines against *Mycobacterium tuberculosis*: an alternative to the BCG vaccine or a BCG-prime  
388 boost? *Expert review of vaccines*. 2018;17(1):31-44.
- 389 11. Shirvani F, Karimi A, Rajabnejad M. BCG vaccination as a prevention strategy, threats and  
390 benefits. *Arch Pediatr Infect Dis*. 2016;4(2):e30180.
- 391 12. Triccas JA, Counoupas C. Novel vaccination approaches to prevent tuberculosis in children.  
392 *Pneumonia*. 2016;8(1):18.
- 393 13. McHugh KJ, Guarecuco R, Langer R, Jaklenec A. Single-injection vaccines: Progress, challenges,  
394 and opportunities. *Journal of Controlled Release*. 2015;219:596-609.
- 395 14. Khademi F, Taheri R-A, Avarvand AY, Vaez H, Momtazi-Borojeni AA, Soleimanpour S. Are  
396 chitosan natural polymers suitable as adjuvant/delivery system for anti-tuberculosis vaccines? *Microbial*  
397 *pathogenesis*. 2018;121:218-23.
- 398 15. Khademi F, Derakhshan M, Yousefi-Avarvand A, Tafaghodi M. Potential of polymeric particles as  
399 future vaccine delivery systems/adjuvants for parenteral and non-parenteral immunization against  
400 tuberculosis: A systematic review. *Iranian journal of basic medical sciences*. 2018;21(2):116.
- 401 16. Khademi F, Yousefi-Avarvand A, Derakhshan M, Meshkat Z, Tafaghodi M, Ghazvini K, et al.  
402 *Mycobacterium tuberculosis* HspX/EsxS fusion protein: gene cloning, protein expression, and  
403 purification in *Escherichia coli*. *Reports of Biochemistry & Molecular Biology*. 2017;6(1):15.
- 404 17. Khademi F, Sahebkar A, Fasihi-Ramandi M, Taheri RA. Induction of strong immune response  
405 against a multicomponent antigen of *Mycobacterium tuberculosis* in BALB/c mice using PLGA and  
406 DOTAP adjuvant. *Apmis*. 2018;126(6):509-14.

- 407 18. Khademi F, Yousefi A, Derakhshan M, Najafi A, Tafaghodi M. Enhancing immunogenicity of novel  
408 multistage subunit vaccine of Mycobacterium tuberculosis using PLGA: DDA hybrid nanoparticles and  
409 MPLA: Subcutaneous administration. Iranian Journal of Basic Medical Sciences. 2019;22(8):893.
- 410 19. Wang X, Zhang J, Liang J, Zhang Y, Teng X, Yuan X, et al. Protection against Mycobacterium  
411 tuberculosis infection offered by a new multistage subunit vaccine correlates with increased number of  
412 IFN- $\gamma$ + IL-2+ CD4+ and IFN- $\gamma$ + CD8+ T cells. PloS one. 2015;10(3):e0122560.
- 413 20. Avarvand AY, Meshkat Z, Khademi F, Tafaghodi M. Immunogenicity of HspX/EsxS fusion protein  
414 of Mycobacterium tuberculosis along with ISCOMATRIX and PLUSCOM nano-adjuvants after  
415 subcutaneous administration in animal model. Microbial Pathogenesis. 2021;154:104842.
- 416 21. McBurney WT, Lendemans DG, Myschik J, Hennessy T, Rades T, Hook S. In vivo activity of  
417 cationic immune stimulating complexes (PLUSCOMs). Vaccine. 2008;26(35):4549-56.
- 418 22. Morelli AB, Becher D, Koernig S, Silva A, Drane D, Maraskovsky E. ISCOMATRIX: a novel adjuvant  
419 for use in prophylactic and therapeutic vaccines against infectious diseases. Journal of medical  
420 microbiology. 2012;61(7):935-43.
- 421 23. Lendemans DG, Myschik J, Hook S, Rades T. Cationic cage-like complexes formed by DC-  
422 cholesterol, Quil-A, and phospholipid. Journal of pharmaceutical sciences. 2005;94(8):1794-807.
- 423 24. Khademi F, Derakhshan M, Yousefi-Avarvand A, Najafi A, Tafaghodi M. A novel antigen of  
424 Mycobacterium tuberculosis and MPLA adjuvant co-entrapped into PLGA: DDA hybrid nanoparticles  
425 stimulates mucosal and systemic immunity. Microbial pathogenesis. 2018;125:507-13.
- 426 25. Drane D, Gittleson C, Boyle J, Maraskovsky E. ISCOMATRIX™ adjuvant for prophylactic and  
427 therapeutic vaccines. Expert review of vaccines. 2007;6(5):761-72.
- 428 26. Maraskovsky E, Schnurr M, Wilson NS, Robson NC, Boyle J, Drane D. Development of  
429 prophylactic and therapeutic vaccines using the ISCOMATRIX adjuvant. Immunology and cell biology.  
430 2009;87(5):371-6.
- 431 27. Bigaeva E, Doorn Ev, Liu H, Hak E. Meta-analysis on randomized controlled trials of vaccines with  
432 QS-21 or ISCOMATRIX adjuvant: safety and tolerability. PloS one. 2016;11(5):e0154757.
- 433 28. Mehravaran A, Jaafari MR, Jalali SA, Khamesipour A, Tafaghodi M, Hojatizade M, et al. Cationic  
434 immune stimulating complexes containing soluble Leishmania antigens: preparation, characterization  
435 and in vivo immune response evaluation. Iranian Journal of Immunology. 2015;12(4):274-87.
- 436 29. Badiie A, Shargh VH, Khamesipour A, Jaafari MR. Micro/nanoparticle adjuvants for  
437 antileishmanial vaccines: present and future trends. Vaccine. 2013;31(5):735-49.
- 438 30. تفقدي، خادمی، زاده ش، فیروزی. Polymer-based nanoparticles as delivery systems for treatment and  
439 vaccination of tuberculosis.
- 440 31. Kaufmann SH, editor Tuberculosis vaccines: time to think about the next generation. Seminars in  
441 immunology; 2013: Elsevier.
